# Supplementary material
Source: PubMed Central journal article supplement (PMC4143431)
Supplement: NIHMS578819-supplement-01.pdf [file NIHMS578819-supplement-01.pdf]

**Table S1. Characteristics of patients with and without testosterone measurement**

| Factor                    | With testosterone measurement<br>(N=2419) | Without testosterone measurement<br>(N=23281) |
|---------------------------|-------------------------------------------|-----------------------------------------------|
| Age*                      | 67.3±11.3                                 | 72.1±11.5                                     |
| African American          | 268(11.1)                                 | 2293(9.8)                                     |
| CKDEPI eGFR at Inception* | 49.1±9.5                                  | 47.0±10.5                                     |
| eGFR groups *             |                                           |                                               |
| 45-59                     | 1776(73.4)                                | 15106(64.9)                                   |
| 30-44                     | 511(21.1)                                 | 6134(26.3)                                    |
| 15-29                     | 132(5.5)                                  | 2041(8.8)                                     |
| BMI *                     | 29.4±5.4                                  | 28.9±5.5                                      |
| BMI group *               |                                           |                                               |
| <18.5 kg/m2               | 10(0.41)                                  | 169(0.73)                                     |
| 18.5-24.9 kg/m2           | 457(18.9)                                 | 4969(21.3)                                    |
| 25-29.9 kg/m2             | 997(41.2)                                 | 9232(39.7)                                    |
| 30+ kg/m2                 | 931(38.5)                                 | 7781(33.4)                                    |
| Missing                   | 24(0.99)                                  | 1130(4.9)                                     |
| Smoking Status*           |                                           |                                               |
| No                        | 2123(87.8)                                | 17503(75.2)                                   |
| Yes                       | 176(7.3)                                  | 1744(7.5)                                     |
| Missing                   | 120(5.0)                                  | 4034(17.3)                                    |
| Diabetes *                | 744(30.8)                                 | 5219(22.4)                                    |
| Hypertension *            | 2243(92.7)                                | 19100(82.0)                                   |
| Cerebrovascular disease   | 252(10.4)                                 | 2301(9.9)                                     |
| Malignancy                | 673(27.8)                                 | 6340(27.2)                                    |
| CAD                       | 714(29.5)                                 | 6755(29.0)                                    |
| CHF *                     | 330(13.6)                                 | 2321(10.0)                                    |
| Hyperlipidemia *          | 2055(85.0)                                | 17707(76.1)                                   |

CKD EPI: chronic kidney disease epidemiology collaboration equation, BMI: body mass index, CAD: coronary artery disease, CHF: chronic heart failure

Values presented as Mean ± SD with t-test; or N(%) with chi-square test unless otherwise noted.

\*Significantly different between patients with and without testosterone data
